# Supplementary material for: The Impact of Wealth Status on Food Intake Patterns in Filipino School-Aged Children and Adolescents
Source: PubMed Central journal article supplement (PMC6950240; doi:10.3390/nu11122910), 2019-12-02
Supplement: nutrients-11-02910-s001.pdf [file nutrients-11-02910-s001.pdf]

**Supplementary Table 1. Food group intakes (grams) in 10-12 year old children, split by socio-economic status (mean and SE)**

| <b>Food Groups</b>                            | <b>Poor<br/>(n=1581)</b> | <b>Middle<br/>(n=519)</b> | <b>Rich<br/>(n=798)</b> | <b>p-value<sup>†</sup></b> |
|-----------------------------------------------|--------------------------|---------------------------|-------------------------|----------------------------|
| Rice, Noodles, & Pasta <sup>1</sup>           | 265.5 (3.7)              | 251.8 (6)                 | 255.2 (4.8)             | 0.239                      |
| Bread, Rolls, & Biscuits                      | 59.2 (2.3)               | 70.9 (3.6)                | 65.1 (2.7)              | 0.002 <sup>a</sup>         |
| Cereals                                       | 29.3 (2.8)               | 30.3 (1.3)                | 42.9 (4.8)              | 0.04 <sup>b</sup>          |
| Savory Snacks <sup>2</sup>                    | 24.7 (1.4)               | 33.5 (4.3)                | 35.8 (3)                | 0.000 <sup>b</sup>         |
| Grain Based Mixed Dishes <sup>3</sup>         | 250.7 (16.1)             | 257.7 (17.4)              | 223.5 (11.4)            | 0.109                      |
| Other Grain Products <sup>4</sup>             | 157.5 (6)                | 152 (15)                  | 79.4 (14.3)             | 0.000 <sup>b,c</sup>       |
| Vegetables                                    | 77.1 (2.9)               | 58.9 (3.2)                | 65.9 (3.5)              | 0.049                      |
| Fruits                                        | 106 (6.9)                | 96.4 (11.8)               | 78.3 (6.7)              | 0.000 <sup>b</sup>         |
| Fish and Shellfish <sup>5</sup>               | 60 (1.6)                 | 57.3 (2.6)                | 67.8 (2.6)              | 0.001 <sup>b,c</sup>       |
| Meat                                          | 93.4 (4)                 | 104.5 (4.7)               | 133.8 (3.9)             | 0.000 <sup>b,c</sup>       |
| Egg & Egg Dishes                              | 38.1 (1.4)               | 41.9 (2.1)                | 42.1 (1.5)              | 0.036 <sup>b</sup>         |
| Beans, Nuts, & Peas                           | 50.5 (6)                 | 51.1 (11.6)               | 59 (10.5)               | 0.452                      |
| Nut/Pea/Beans-Based Mixed Dishes <sup>6</sup> | 16.4 (3.5)               | 33.3 (18.5)               | 26 (24)                 | 0.5                        |
| Milk <sup>7</sup>                             | 23.5 (2.6)               | 36.8 (9)                  | 47.5 (4.6)              | 0.000 <sup>b,c</sup>       |
| Non Alcoholic Beverages <sup>8</sup>          | 6.7 (2)                  | 15.8 (7)                  | 54.7 (17.1)             | 0.000 <sup>b,c</sup>       |
| Sugar-sweetened Beverages <sup>9</sup>        | 108.5 (6.5)              | 125.7 (10.1)              | 196.7 (8.9)             | 0.000 <sup>b,c</sup>       |
| Sweet Bakery Product <sup>10</sup>            | 50.8 (2.6)               | 46 (2.6)                  | 55.6 (2.8)              | 0.05                       |
| Candy                                         | 15.3 (1.9)               | 16.7 (2.1)                | 19.1 (2.1)              | 0.215                      |
| Native Dessert Snacks <sup>11</sup>           | 106.3 (8.1)              | 98.9 (7.1)                | 91.1 (4.6)              | 0.841                      |
| Ice Cream and Popsicles                       | 105.4 (5.7)              | 126.3 (12.6)              | 166.1 (20.7)            | 0.055                      |
| Pancakes, Waffle, & French Toast              | 52.2 (6.7)               | 73.8 (17.7)               | 69.2 (7.7)              | 0.069                      |
| Other Dessert Snacks <sup>12</sup>            | 24.7 (5.7)               | 31.9 (5)                  | 30.6 (8.6)              | 0.574                      |
| Fat <sup>13</sup>                             | 13.7 (1.6)               | 9.8 (1.5)                 | 18.9 (4.2)              | 0.096                      |
| Fats & oils Products <sup>14</sup>            | 7.9 (1.6)                | 11.6 (1.4)                | 8.1 (1)                 | 0.151                      |
| Table sugar, syrup, preserve jams & jellies   | 10 (0.3)                 | 11.8 (0.9)                | 14.4 (1.4)              | 0.004 <sup>b</sup>         |
| Seasonings <sup>15</sup>                      | 9.7 (0.4)                | 12.5 (1)                  | 15.6 (1.1)              | 0.000 <sup>a,b</sup>       |
| Flour, Cornstarch, Baking Powder, & Yeast     | 14.8 (6.5)               | 26.1 (5.3)                | 30.1 (6.2)              | 0.479                      |
| Miscellaneous Food Items <sup>16</sup>        | 6.6 (0.5)                | 11.3 (1.7)                | 11.2 (1.4)              | 0.002 <sup>a,b</sup>       |

<sup>1</sup>includes rice (also rice products), pasta, and noodles

<sup>2</sup>includes potato based, corn tortillas, prawn/fish crackers, curls and puffs

<sup>3</sup>includes Champorado Pre-Mix, Rice gruel, Spaghetti, meat balls & tomato sauce, canned

<sup>4</sup>includes corn grits, cornmeal, Job's tears grain, and Millet glutinous

<sup>5</sup>includes fresh, dried, cooked, smoked, canned fish and fish products

<sup>6</sup>includes Green pea, dried, fried & seasoned, Fries green pea-corn-peanut mixture, and Lima bean, fried & seasoned

<sup>7</sup>includes fluid and powdered milk, dairy products, and other milk

<sup>8</sup>includes tea, coffee, cocoa powder, and coconut water

<sup>9</sup>includes fruit-based, chocolate/chocolate flavored, soy, prepared sweet, and other sweetened beverages and softdrinks

<sup>10</sup>includes cookies, biscuit/crackers, sweet breads, cakes, pies, and other pastries

<sup>11</sup>includes cassava, banana, mango snacks and other snacks

<sup>12</sup>includes Chocolate Creams, Chocolate, tablea, Coconut meat, Peanut brittle, Polvoron, popcorn, etc.

<sup>13</sup>includes coconut cream, margarine, fat from pork and beef

<sup>14</sup>includes sandwich spread, all-purpose dressing, mayonnaise, coconut cream curd etc.

<sup>15</sup>includes condiments, pasta/pizza sauces, herbs and Spices, and other seasonings flavoring extract

<sup>16</sup>includes coffee creamer, food coloring, gelatin powder, spring roll wrapper, strained, juice from duodenum, locust, bird's nest, azolla pinnata, and vegemeat, textured wheat & soy protein

<sup>†</sup>significantly different if p-value < 0.05, <sup>a</sup>poor vs middle, <sup>b</sup>poor vs rich, <sup>c</sup>middle vs rich (Oneway ANOVA with Bonferroni multiple comparison test)

**Supplementary Table 2.** Food group intakes in 13-18 year old children, split by socio-economic status (mean and SE)

| Food Groups                                   | Poor<br>(n=2536) | Middle<br>(n=1082) | Rich<br>(n=1684) | p-value <sup>†</sup>   |
|-----------------------------------------------|------------------|--------------------|------------------|------------------------|
| Rice, Noodles, & Pasta <sup>1</sup>           | 319.3 (3.6)      | 330.2 (5.2)        | 301.1 (4)        | 0.000 <sup>b,c</sup>   |
| Bread, Rolls, & Biscuits                      | 68.9 (2.2)       | 66.4 (2.4)         | 75.9 (2.1)       | 0.001 <sup>b,c</sup>   |
| Cereals                                       | 43 (12.5)        | 28.6 (2.8)         | 37.9 (4.7)       | 0.607                  |
| Savory Snacks <sup>2</sup>                    | 30.6 (1.4)       | 34.8 (1.9)         | 42.2 (2.7)       | 0.000 <sup>a,b</sup>   |
| Grain Based Mixed Dishes <sup>3</sup>         | 273.7 (35.6)     | 324.3 (49)         | 324.6 (28.9)     | 0.565                  |
| Other Grain Products <sup>4</sup>             | 180.8 (5.1)      | 196.5 (15.4)       | 112.3 (15.3)     | 0.000 <sup>b,c</sup>   |
| Vegetables                                    | 90.6 (2.5)       | 74.1 (3.2)         | 69 (2.6)         | 0.000 <sup>a,b</sup>   |
| Fruits                                        | 120.2 (5.6)      | 105.6 (7.5)        | 87.4 (6.6)       | 0.000 <sup>a,b</sup>   |
| Fish and Shellfish <sup>5</sup>               | 69.5 (1.5)       | 75.2 (2.4)         | 74 (2.2)         | 0.004 <sup>a,b</sup>   |
| Meat                                          | 103.5 (3.1)      | 118.3 (4)          | 150.2 (3.2)      | 0.000 <sup>a,b,c</sup> |
| Egg & Egg Dishes                              | 42.7 (1.3)       | 40.7 (1.6)         | 42.4 (1.1)       | 0.277                  |
| Beans, Nuts, & Peas                           | 40.9 (2.4)       | 43.9 (3.7)         | 57.2 (6.2)       | 0.186                  |
| Nut/Pea/Beans-Based Mixed Dishes <sup>6</sup> | 21.3 (7.7)       | 12.2 (8.8)         | 23.3 (6.6)       | 0.46                   |
| Milk <sup>7</sup>                             | 17.1 (1.9)       | 31 (4.2)           | 45.5 (4)         | 0.000 <sup>a,b,c</sup> |
| Non Alcoholic Beverages <sup>8</sup>          | 10.2 (2.1)       | 22.9 (5.6)         | 39.5 (6.9)       | 0.000 <sup>b,c</sup>   |
| Sugar-sweetened Beverages <sup>9</sup>        | 134.6 (5.7)      | 170.7 (7.9)        | 220.1 (6.4)      | 0.000 <sup>a,b,c</sup> |
| Sweet Bakery Product <sup>10</sup>            | 60.3 (3)         | 56.3 (3.9)         | 58.8 (2.8)       | 0.968                  |
| Candy                                         | 16.3 (1.7)       | 16 (2.5)           | 17 (1.8)         | 0.955                  |
| Native Dessert Snacks <sup>11</sup>           | 116.2 (8.3)      | 116.2 (6.2)        | 117.2 (8.5)      | 0.588                  |
| Ice Cream and Popsicles                       | 117 (9.3)        | 116.7 (12.1)       | 97.6 (7.7)       | 0.092                  |
| Pancakes, Waffle, & French Toast              | 79.1 (9)         | 84.3 (15.7)        | 68.8 (5.3)       | 0.873                  |
| Other Dessert Snacks <sup>12</sup>            | 33.5 (8.7)       | 26.7 (4.6)         | 28.7 (4)         | 0.87                   |
| Fat <sup>13</sup>                             | 13.4 (0.7)       | 17.6 (3.1)         | 13.8 (1.2)       | 0.951                  |
| Fats & oils Products <sup>14</sup>            | 11.1 (3.2)       | 9.1 (1.7)          | 9.3 (0.8)        | 0.739                  |
| Table sugar, syrup, preserve jams & jellies   | 11.7 (0.4)       | 12.5 (0.7)         | 13.4 (0.6)       | 0.473                  |
| Seasonings <sup>15</sup>                      | 11.2 (0.5)       | 13.5 (0.8)         | 17.2 (0.8)       | 0.000 <sup>a,b,c</sup> |
| Flour, Cornstarch, Baking Powder, & Yeast     | 14.5 (3.1)       | 25.8 (6.9)         | 38.2 (7.1)       | 0.045 <sup>b</sup>     |
| Miscellaneous Food Items <sup>16</sup>        | 8.4 (0.8)        | 10.4 (1.1)         | 11.2 (0.9)       | 0.002 <sup>b</sup>     |

<sup>1</sup>includes rice (also rice products), pasta, and noodles<sup>2</sup>includes potato based, corn tortillas, prawn/fish crackers, curls and puffs<sup>3</sup>includes Champorado Pre-Mix, Rice gruel, Spaghetti, meat balls & tomato sauce, canned,<sup>4</sup>includes corn grits, cornmeal, Job's tears grain, and Millet glutinous<sup>5</sup>includes fresh, dried, cooked, smoked, canned fish and fish products<sup>6</sup>includes Green pea, dried, fried & seasoned, Fries green pea-corn-peanut mixture, and Lima bean, fried & seasoned<sup>7</sup>includes fluid and powdered milk, dairy products, and other milk<sup>8</sup>includes tea, coffee, cocoa powder, and coconut water<sup>9</sup>includes fruit-based, chocolate/chocolate flavored, soy, prepared sweet, and other sweetened beverages and softdrinks<sup>10</sup>includes cookies, biscuit/crackers, sweet breads, cakes, pies, and other pastries<sup>11</sup>includes cassava, banana, mango snacks and other snacks<sup>12</sup>includes Chocolate Creams, Chocolate, tablea, Coconut meat, Peanut brittle, Polvoron, popsorn, etc.<sup>13</sup>includes coconut cream, margarine, fat from pork and beef<sup>14</sup>includes sandwich spread, all-purpose dressing, mayonnaise, coconut cream curd etc.<sup>15</sup>includes condiments, pasta/pizza sauces, herbs and Spices, and other seasonings flavoring extract<sup>16</sup>includes coffee creamer, food coloring, gelatin powder, spring roll wrapper, strained, juice from duodenum, locust, bird's nest, azolla pinnata, and

vegeat, textured wheat & soy protein

<sup>a</sup>significantly different if p-value < 0.05, <sup>a</sup>poor vs middle, <sup>b</sup>poor vs rich, <sup>c</sup>middle vs rich (Oneway ANOVA with Bonferroni multiple comparison test)
